# Supplementary figures and images for: Dbf4 Zn-Finger Motif Is Specifically Required for Stimulation of Ctf19-Activated Origins in Saccharomyces cerevisiae
Source: MDPI journal article supplement (doi:10.3390/genes13122202), 2022-11-24

Figure S3

A

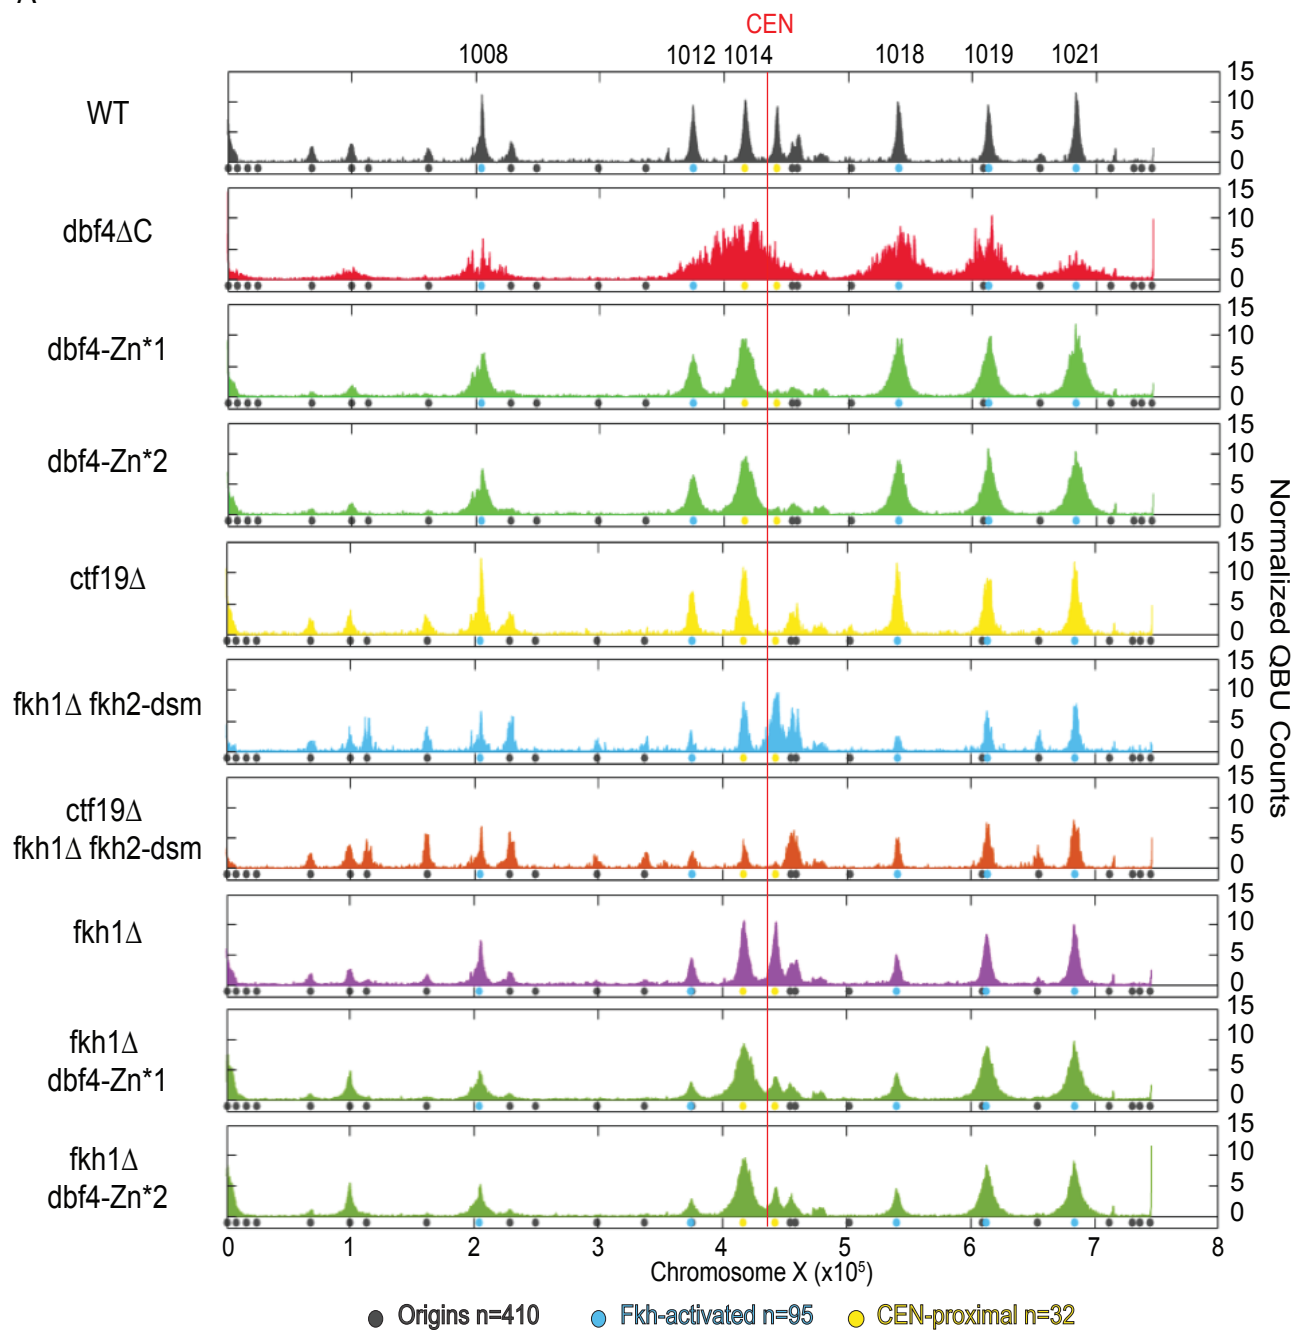

B

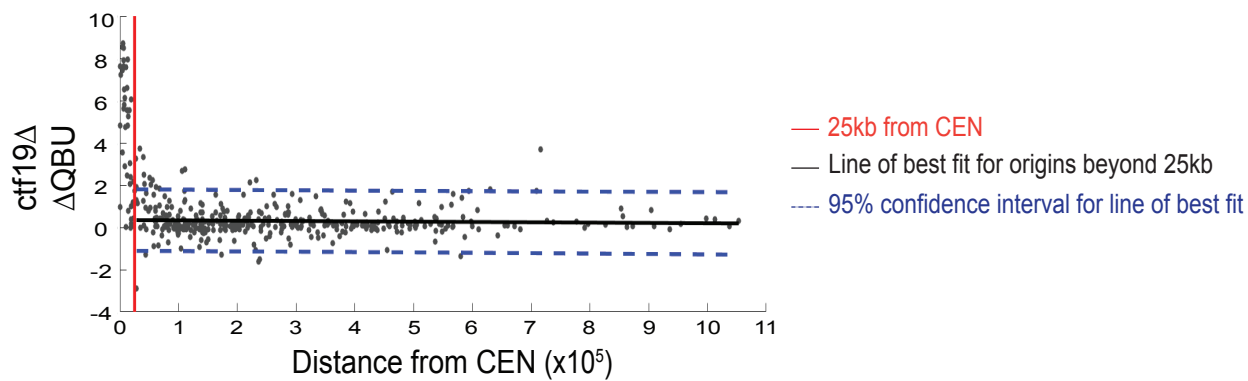

Supplement: s1 [file s1]

Figure S2

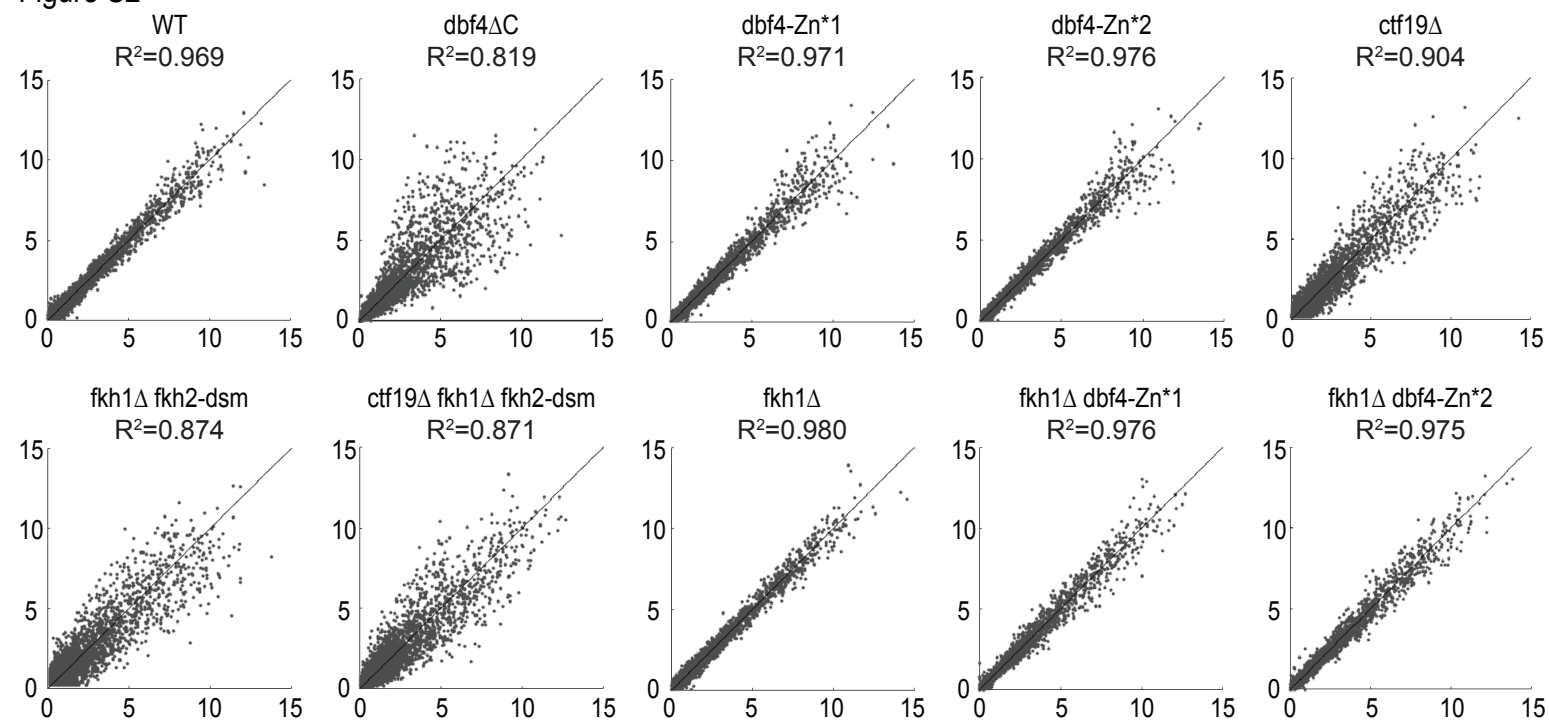

Supplement: s1 [file s1]

Figure S1

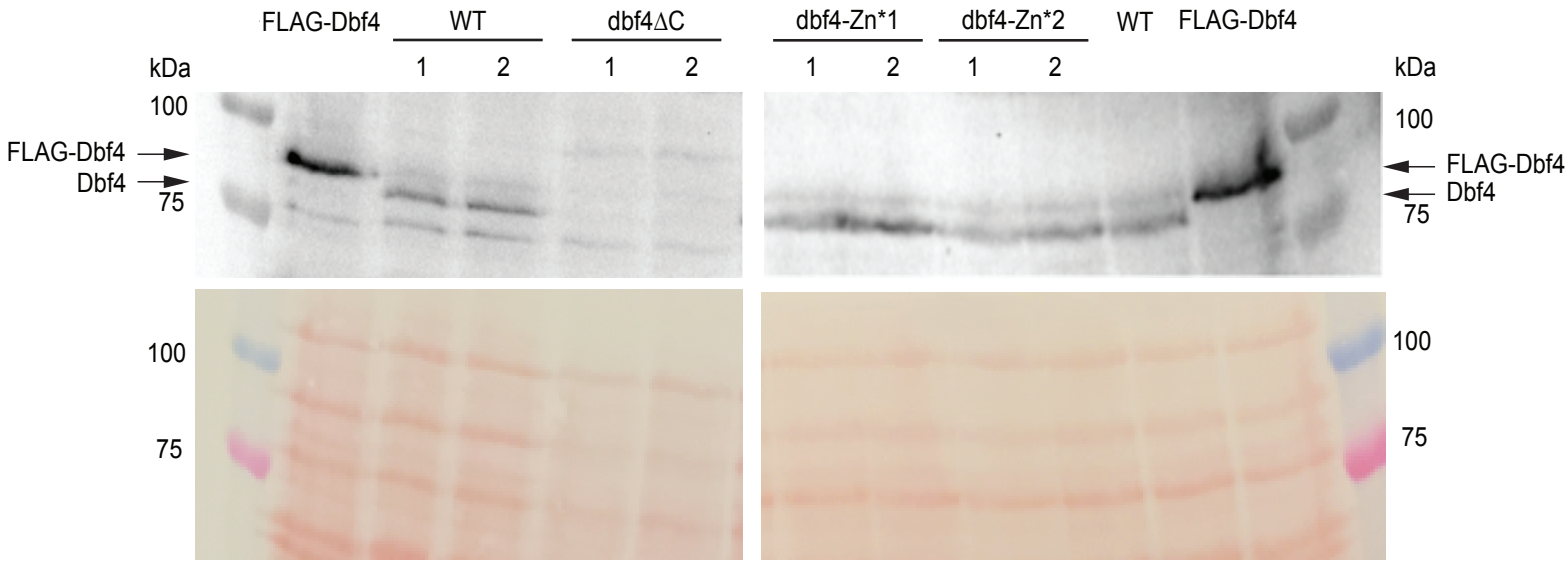

Supplement: s1 [file s1]
